# Supplementary material
Source: MDPI journal article supplement (https://www.mdpi.com/2071-1050/13/17/9604)
Supplement: s1 [file s1]

Archive with 3 entries (3 files):
- Brzezicki_PRISMA_checklist.pdf
- Brzezicki_PRISMA_flow_diagram.pdf
- Brzezicki_supplementary.xlsx
