# Supplementary material
Source: MDPI journal article supplement (https://www.mdpi.com/2071-1050/13/17/9604)
Supplement: s1 [file s1 › Brzezicki_supplementary.xlsx]

## Sheet: Arkusz1
Supplementary material, Table 9.
All the systems described in the paper in a tabularise form, with the data where available.
A systematic review of the most recent concepts in smart windows technologies with a focus on electrochromicsm, Marcin Brzezicki
				Tsol			Tvis			TNIR			energy storage	remarks
				bleached	coloured	ΔTsol	bleached	coloured	ΔTvis/LUM	bleached	coloured	ΔTNIR
Table 2
1	Wittwer et al.	2004	Active gasochromic	0.76	0.05	0.71	0.77	0.05	0.72	n/a	n/a	n/a
2	Liang et al.	2019	Active gasochromic	0.72	0.31	0.41	n/a	n/a		n/a	n/a	n/a
3	Wolfe et al.	2018	Optofluidic	n/a	n/a		0.85	0.08	0.77	n/a	n/a	n/a
	Heiz		SPD	n/a	n/a		0.95	0.02	0.93	n/a	n/a	n/a
5	Hillmer et al.l	2018	Microelectromechanical	n/a	n/a		n/a	n/a		n/a	n/a	n/a
6	Mori et al.	2016	Electrostatic	n/a	n/a		0.53	0.36	0.17	n/a	n/a	n/a
7	Shrestha et al.	2018	Microwrinkled TiO2 Films	n/a	n/a		0.81	0.018	0.792	n/a	n/a	n/a
8	Lampert	1998	PDLC	n/a	n/a		0.5	0.1	0.4	n/a	n/a	n/a
9	Lampert	2004	PDLC	0.74	0.14	0.6	0.75	0.18	0.57	n/a	n/a	n/a
10	Murray et al.	2016	PDLC	n/a	n/a		0.74	0.45	0.29	n/a	n/a	n/a		no a-Si
				n/a	n/a		0.68	0.41	0.27	n/a	n/a	n/a		13 nm a-Si
				n/a	n/a		0.65	0.4	0.25	n/a	n/a	n/a		28 nm a-Si
11	De Filippo et al.	2019	PDLC	n/a	n/a		0.65	0.01	0.64	n/a	n/a	n/a
12	Sol et al.	2017	PDLC	n/a	n/a		0.66	0.06	0.6	n/a	n/a	n/a		STN Yell25c
13	Ghosh	2017	SPD	0.64	0.18	0.46	n/a	n/a		n/a	n/a	n/a
Table 3
1	Yilmaz et al.	2020	nanocrystalline ITO	0.85	0.26	0.59	0.86	0.42	0.44	0.9	0.13	0.77
2	Nguyen et al.	2019		n/a	n/a		0.88	0.67	0.21	n/a	n/a	0.63
3	Nguyen et al.	2019	opal (IO) nanostructures	0.83	0.71	0.12	n/a	n/a		n/a	n/a	0.57		150 s WO3 electrodeposition
4	Nunes et al.	2019	a-IZO	n/a	n/a		0.52	0.07	0.45	0.61	0.11	0.57
5	Cao et al.	2018	Ta (tantalum) doped titanium oxide (TiO2)	n/a	n/a		n/a	n/a	0.86	n/a	n/a	0.81		only modulation data were given
6	Barawi et al.	2018	vanadium enriched TiO2	n/a	n/a		n/a	n/a	0.3	n/a	n/a	0.7		only modulation data were given
7	Wu et al.	2018	cesium tungsten bronze (CsxWO3)	n/a	n/a		0.78	0.45	0.33	n/a	n/a	0.962
Table 4
1	Sheng et al.	2019	Ta-doped TiO2 nanocrystals	n/a	n/a		n/a	n/a		n/a	n/a	n/a	466.5 mAh m-2 at 150 mA m-2 of current density
2	Wang et al.	2020	Prussian blue	n/a	n/a		n/a	n/a	0.849	n/a	n/a	n/a	78.9 mAh m-
3	Kim et al.	2018	blue and a red colour ECP	n/a	n/a		0.72	n/a		n/a	n/a	n/a	58.8 kW kg_x0002_1,
4	Xie et al.	2019	Mo-doped WO3	n/a	n/a		n/a	n/a	0.6	n/a	n/a	n/a	19.1 mF cm−2
5	Wang et al.	2018	mesoporous WO3	n/a	n/a		n/a	n/a	75.6%	n/a	n/a	n/a	75.3 mAh g-1
6	Pan et al.	2020	NiO/PB composite nanosheets	n/a	n/a		n/a	n/a	0.67	n/a	n/a	n/a	11.50 mF cm-2
Table 5
1	Lee et al.	2019	tantalum oxide Ta2O5	0.73	0.28	0.45	0.63	0.18	0.45	n/a	n/a	n/a		at 20 deg
				0.44	0.08	0.36	0.39	0.05	0.34	n/a	n/a	n/a		at 80 deg
Table 6
1	Lu et al.	2018	PEDOT polymer	n/a	n/a		n/a	n/a	0.25	n/a	n/a	n/a		light emmitting 35.0 and 7.5 cdA-1
2	Cossari et al.	2018		n/a	n/a		n/a	n/a	0.57	n/a	n/a	n/a		luminance from 300 cd m-2 to 800 cd m-2
Table 7
1	Lu et al.	2016	tungsten oxide nanorods	n/a	n/a		n/a	n/a	0.41	n/a	n/a	n/a
2	Shi et al.	2018	WO3 nanocores	n/a	n/a		0.65	0.08	0.57	n/a	n/a	n/a		different values for a different WO3/PEDOT combinations
3	Najafi-Ashtiani et al.	2018	Ag nanorods	n/a	n/a		0.61	0.29	0.32	n/a	n/a	n/a		Ag1-W
				n/a	n/a		0.57	0.24	0.33	n/a	n/a	n/a		Ag2-W
				n/a	n/a		0.56	0.19	0.37	n/a	n/a	n/a		Ag3-W
4	Shi et al.	2020	WO3 nanoarray	n/a	n/a		n/a	n/a	0.9	n/a	n/a	0.94	47.4 mF/cm2
5	Wei-qi et al.	2018	mesoporous WO3	n/a	n/a		n/a	n/a	0.756	n/a	n/a	n/a	75.3 mA h g−1
End of file
